# Supplementary material for: Green Synthesis of Superparamagnetic Iron Oxide Nanoparticles with Eucalyptus globulus Extract and Their Application in the Removal of Heavy Metals from Agricultural Soil
Source: MDPI journal article supplement (doi:10.3390/molecules27041367), 2022-02-17
Supplement: s1 [file s1]

## Supporting Information

### Characterization by Electron Energy Loss Spectroscopy (EELS)

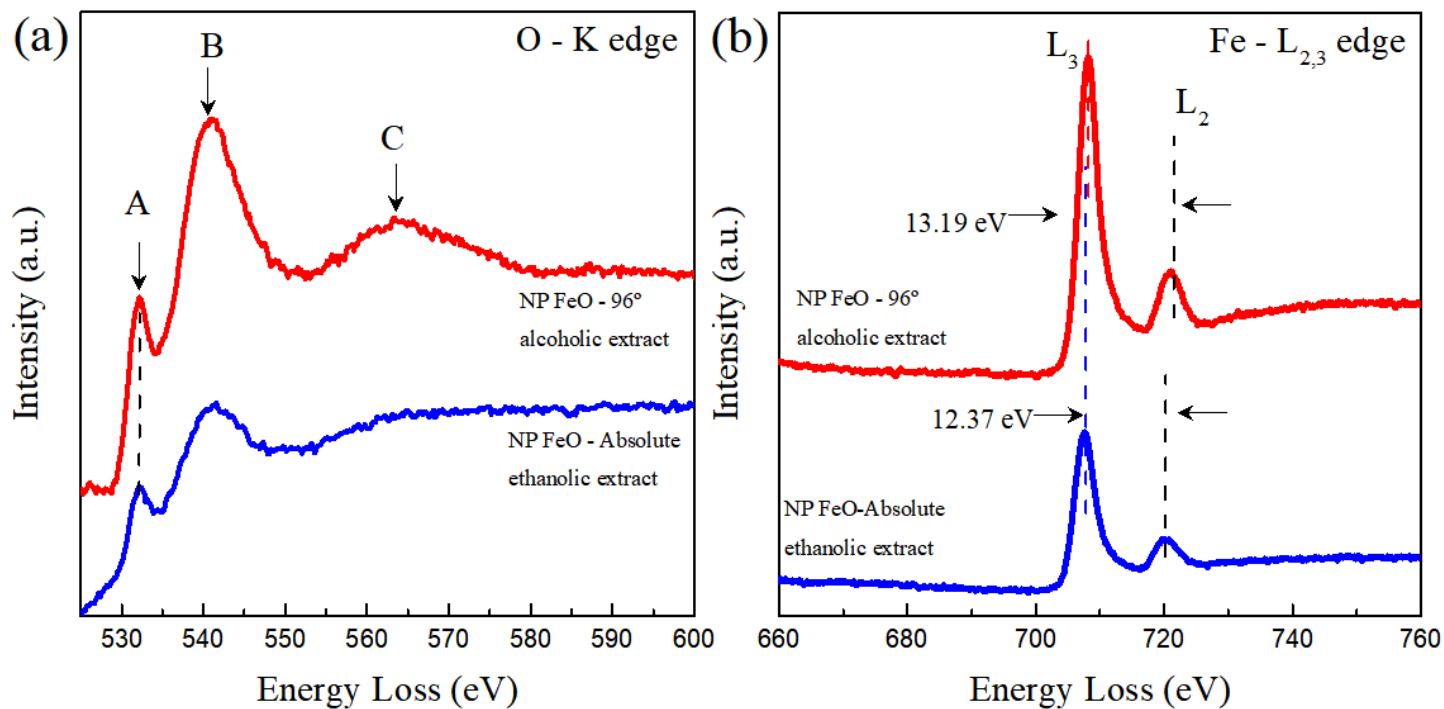

**Figure S1.** EELS spectra of O-K edges (a) and Fe-L<sub>2,3</sub> edges (b) acquired from a FeO NP 96° alcoholic extract (red curves) and FeO NP absolute ethanolic extract (blue curves), respectively.

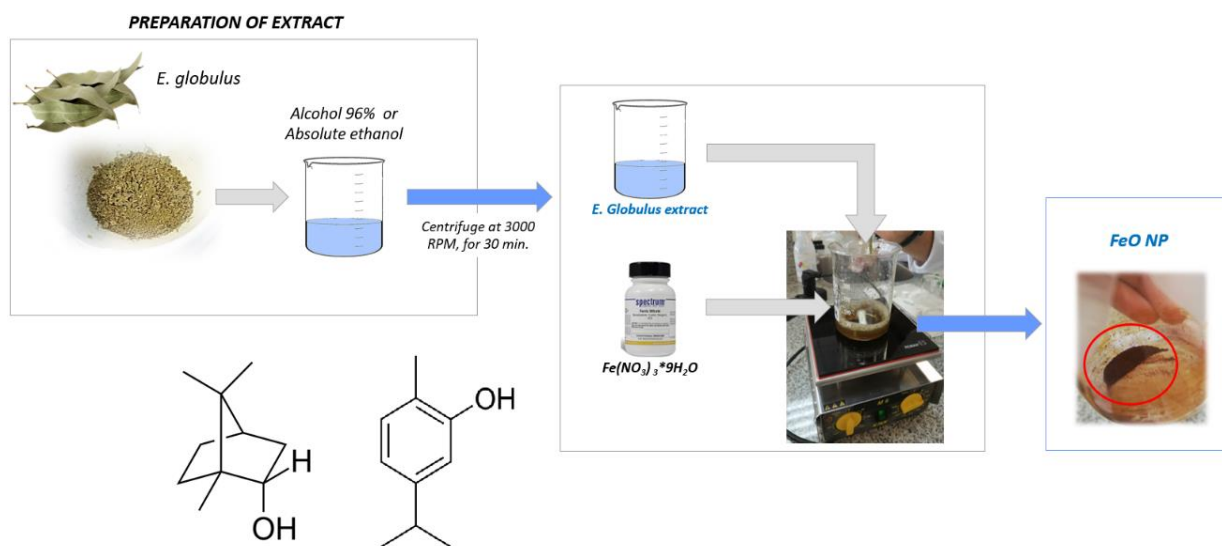

**Figure S2.** Green FeO NP synthesis protocol, using 96% alcoholic and absolute ethanolic extracts of *E. globulus*
